# Supplementary material for: Neuromuscular Plasticity: Disentangling Stable and Variable Motor Maps in the Human Sensorimotor Cortex
Source: PubMed Central journal article supplement (PMC5004060; doi:10.1155/2016/7365609), 2016-08-16

Supplementary figure 1: Intrasubject distribution of original data for seven experimental sessions (■: Session 1; ●: Session 2; ▲: Session 3; ▼: Session 4; ◆: Session 5; ◀: Session 6; ◀: Session 7) in the right, non-dominant hemisphere of three subjects for RMT (a), medial-lateral CoG (b), anterior-posterior CoG (c), mean map MEP amplitude (d), map area (e) and map volume (f). This figure shows the findings for the subjects 3, 9 and 12 of Figure 1 including the data of the seventh measurement (acquired ~1.5 years after session 6).

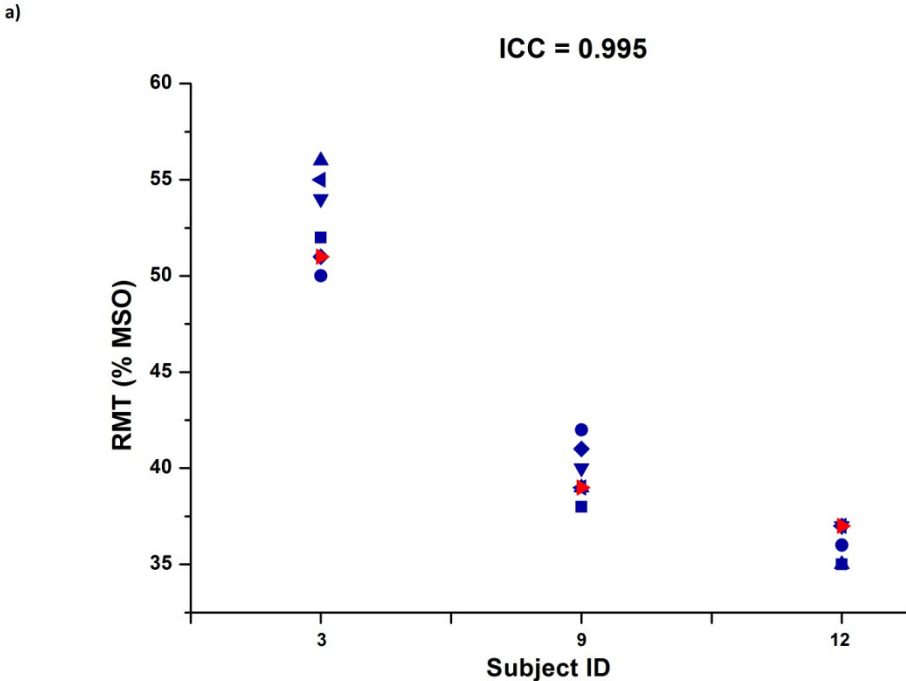

b)

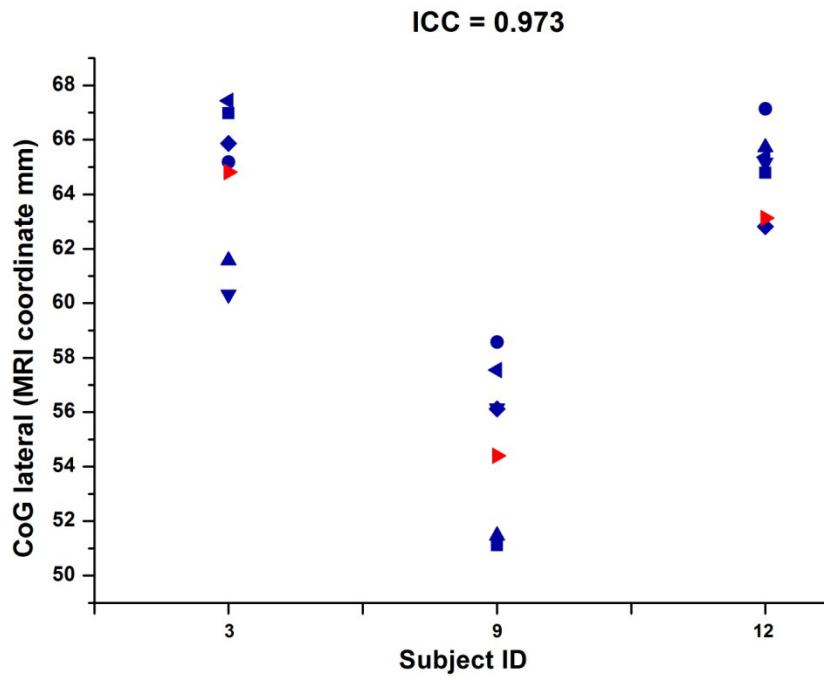

c)

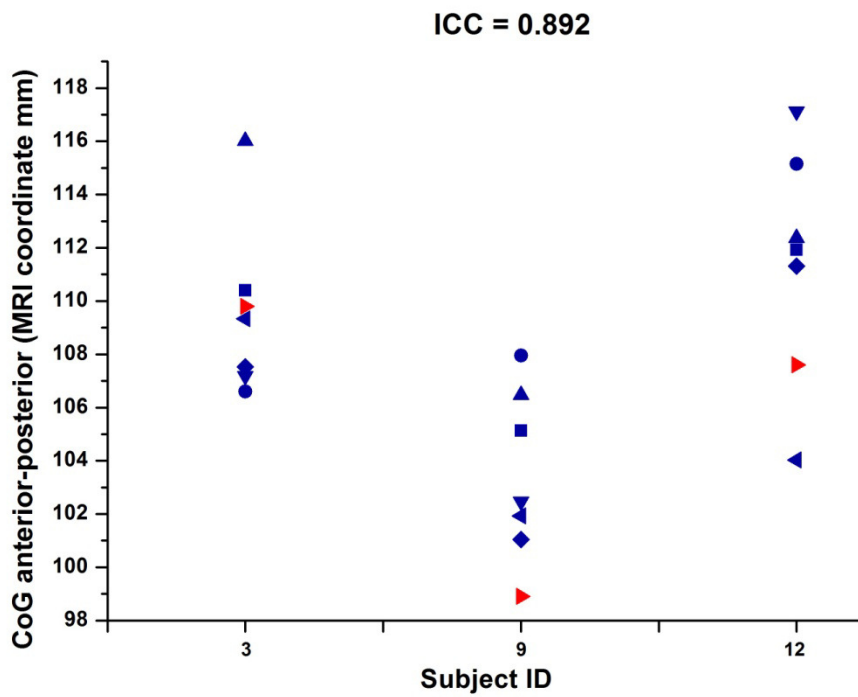

d)

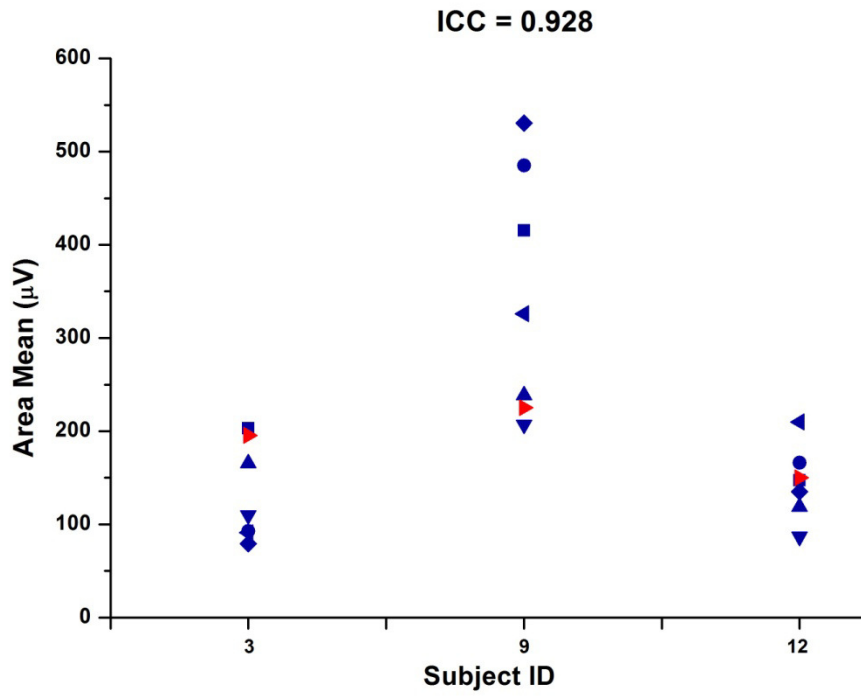

e)

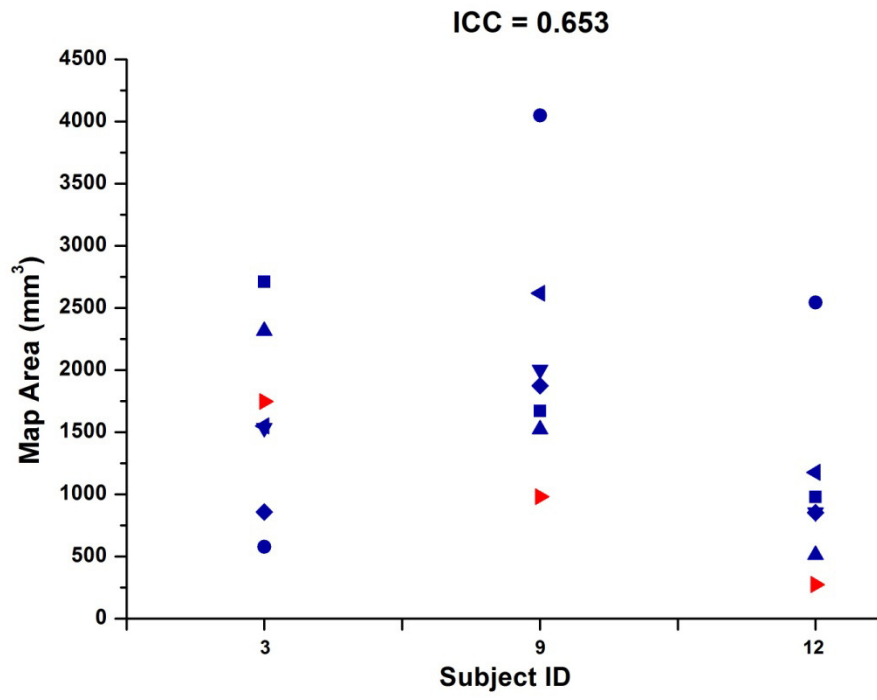

f)

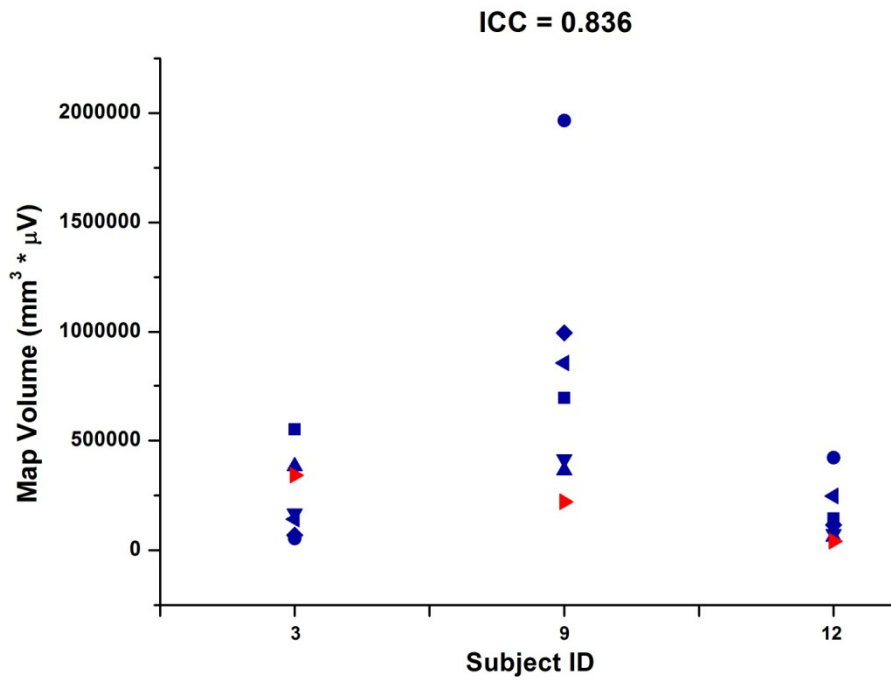

Supplementary figure 2: Motor map group data with mean MEP amplitude in the right hemisphere for the same six subjects examined in the left hemisphere. Color bar indicates mean MEP amplitude in  $\mu\text{V}$  throughout the experimental sessions.

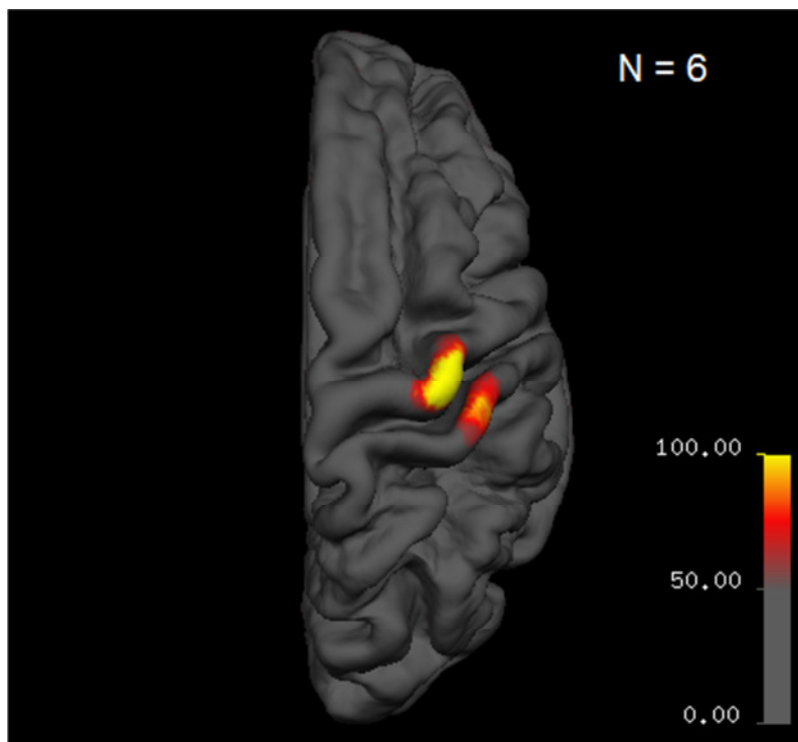

Supplement: 7365609.f1.pdf [file 7365609.f1.pdf]
